# Supplementary material for: Evaluation of Circulating Tumor DNA for Methylated BCAT1 and IKZF1 to Detect Recurrence of Stage II/Stage III Colorectal Cancer (CRC)
Source: Oxford University Press journal article supplement (doi:10.1158/1055-9965.epi-20-0574), 2020-09-21
Supplement: 10559965epi200574-sup-241525_2_supp_6540247_qfzh55.docx [file 10559965epi200574-sup-241525_2_supp_6540247_qfzh55.docx]

Supplemental Table 1: Characteristics of Recurrences

| **Subjects (N=27)** | **Location of Recurrence** | **N** | **Stage II at Diagnosis** | **Stage III at Diagnosis** | **Received Chemotherapy** | **Colvera Positive** | **CEA Positive** | **Median Time to recurrence from end of treatment in years (range)** |
| --- | --- | --- | --- | --- | --- | --- | --- | --- |
| Local/ resectable recurrence   [n=3] | Isolated lesion at anastomosis | **3** | 0 | 3 | 3 | 1 | 0 | 0.7 (0.6-1) |
| Stage IV recurrence   [n= 24) | Isolated lesion/peritoneum | **3** | 0 | 3 | 2 | 3 | 2 | 1.5 (1.3-4.3) |
| Multiple lesions/peritoneum | **4** | 1 | 3 | 4 | 2 | 1 | 1.1 (0.4-1.3) |
| Isolated lesion/brain | **1** | 0 | 1 | 1 | 1 | 1 | 1.1 |
| Isolated lesion/liver | **6** | 2 | 4 | 3 | 3 | 3 | 1.5 (0.5-1.8) |
| Isolated lesion/lung | **1** | 0 | 1 | 1 | 0 | 0 | 0.3 |
| Multiple lesions/liver | **5** | 2 | 3 | 3 | 5 | 4 | 0.6 (0.4 to 4.1) |
| Multiple lesions/lung | **3** | 2 | 1 | 3 | 2 | 2 | 0.9 (0.6-1.3) |
| Multiple lesions/liver and lung | **1** | 1 | 0 | 0 | 0 | 0 | 0.8 |
