# Supplementary material for: Evaluation of Circulating Tumor DNA for Methylated BCAT1 and IKZF1 to Detect Recurrence of Stage II/Stage III Colorectal Cancer (CRC)
Source: Oxford University Press journal article supplement (doi:10.1158/1055-9965.epi-20-0574), 2020-09-21
Supplement: 10559965epi200574-sup-241525_2_supp_6540248_qfzh15.docx [file 10559965epi200574-sup-241525_2_supp_6540248_qfzh15.docx]

Supplemental Table 2: Independent Predictors of Recurrence (effect of current smoking)

|  | Odds Ratio | Standard Error (SE) | 2.5% (CI Odds Ratio) | 97.5% (CI Odds Ratio) | P-value |
| --- | --- | --- | --- | --- | --- |
| Base a | 1.00 |  |  |  |  |
| (Intercept) | -4.94 | 1.40 | 0.0005 | 0.11 | 0.0004*** |
| Age | 0.033 | 0.02 | 0.99 | 1.07 | 0.088 |
| Gender (Male) | 0.62 | 0.44 | 0.78 | 4.43 | 0.16 |
| Previous Smoker | -0.45 | 0.48 | 0.25 | 1.61 | 0.34 |
| Current Smoker | **1.32** | **0.59** | **1.16** | **12.01** | **0.027*** |

a never smoker, female, no recurrence, age at zero

1. Fagerland MW, Lydersen S, Laake P. Recommended tests and confidence intervals for paired binomial proportions. Stat Med. 2014;33(16):2850-75.
