# Supplementary material for: Evaluation of Circulating Tumor DNA for Methylated BCAT1 and IKZF1 to Detect Recurrence of Stage II/Stage III Colorectal Cancer (CRC)
Source: Oxford University Press journal article supplement (doi:10.1158/1055-9965.epi-20-0574), 2020-09-21
Supplement: 10559965epi200574-sup-241525_2_supp_6540249_qfzh35.docx [file 10559965epi200574-sup-241525_2_supp_6540249_qfzh35.docx]

Supplemental Table 3: Characteristics of Subjects with Recurrence

| **ID** | **Gender** | **Age** | **COLVERA result** | **CEA level 5 ng/ml cutoff** | **Stage at diagnosis** | **Location of Primary Tumora** | **Chemotherapy included in primary treatment** | **Location of Recurrenceb** |
| --- | --- | --- | --- | --- | --- | --- | --- | --- |
| **Colvera Positive and CEA Positive** | | | | | | | | |
| R1 | Male | 49 | Positive | 5.5 | IIIA | Left | Yes | Isolated lesion in peritoneum |
| R2 | Female | 72 | Positive | 29 | IIIC | Right | Yes | Multiple liver lesions |
| R3 | Female | 69 | Positive | 6.6 | IIA | Left | Yes | Multiple lung lesions |
| R4 | Male | 70 | Positive | 6.6 | IIIB | Right | Yes | Multiple lung lesions |
| R5 | Male | 59 | Positive | 336.1 | IIIB | Left | Yes | Multiple liver lesions |
| R6 | Female | 83 | Positive | 39.6 | IIIB | Right | No | Isolated lesion in peritoneum |
| R7 | Male | 75 | Positive | 64.8 | IIIA | Right | Yes | Multiple liver lesions |
| R8 | Male | 61 | Positive | 14.4 | IIB | Right | Yes | Multiple lesions in peritoneum |
| R9 | Female | 71 | Positive | 8.2 | IIIC | Right | No | Isolated brain lesion |
| R10 | Female | 67 | Positive | 84.9 | IIIA | Left | No | Isolated liver lesion |
| R11 | Male | 65 | Positive | 32.9 | IIA | Left | No | Isolated liver lesion |
| R12 | Male | 80 | Positive | 9.9 | IIA | Left | No | Multiple liver lesions |
| R13 | Male | 72 | Positive | 5.3 | IIIB | Left | Yes | Isolated liver lesion |
| **Colvera Positive and CEA Negative** | | | | | | | | |
| R14 | Male | 73 | Positive | 2.1 | IIIB | Right | Yes | Lesion in peritoneum adjacent to anastomosis |
| R15 | Male | 61 | Positive | 2.2 | IIIB | Right | Yes | Isolated lesion at anastomosis |
| R16 | Male | 62 | Positive | 3.2 | IIIC | Right | Yes | Isolated lesion in peritoneum |
| R17 | Male | 67 | Positive | 2.2 | IIA | Left | No | Isolated liver lesion |
| **Colvera Negative and CEA Negative** | | | | | | | | |
| R18 | Female | 60 | Negative | 4.1 | IIA | Rectal | Yes | Multiple lung lesions |
| R19 | Male | 52 | Negative | 4.7 | IIIA | Rectal | Yes | Isolated liver lesion |
| R20 | Female | 77 | Negative | 4.2 | IIA | Left | No | Multiple lesions to lung, liver, bone, |
| R21 | Male | 51 | Negative | 1.7 | IIIA | Left | Yes | Multiple lesions in peritoneum |
| R22 | Female | 66 | Negative | 2.1 | IIIB | Left | Yes | Multiple lesions in peritoneum |
| R23 | Male | 66 | Negative | 1.8 | IIIB | Left | Yes | Isolated lung lesion |
| R24 | Female | 72 | Negative | 2.9 | IIA | Right | No | Isolated liver lesion |
| R25 | Male | 54 | Negative | 4.1 | IIIB | Left | Yes | Multiple lesions in peritoneum |
| R26 | Male | 61 | Negative | 2 | IIIB | Right | Yes | Isolated liver lesion |
| R27 | Male | 67 | Negative | 0.9 | IIIB | Left | Yes | Isolated lesion in colon at anastomosis |

a Rectal, Left Colon (Sigmoid, rectosigmoid, descending, splenic flexure), Right Colon (Ileocecal valve, cecum, ascending. hepatic flexure, transverse)

b Local recurrence is defined as in the colon/at anastomosis. Distant recurrence is defined as all other locations.
